# Supplementary material for: Enhancement of the coercivity in Co–Ni layered double hydroxides by increasing basal spacing
Source: Royal Society of Chemistry journal article supplement (doi:10.1039/c6dt01723a), 2016-01-01
Supplement: c6dt01723a1.pdf [file c6dt01723a1.pdf]

# Electronic Supplementary Information (ESI) for Enhancement of the coercivity in Co-Ni layered double hydroxides by increasing basal spacing

*Cuijuan Zhang, Tomoya Tsuboi, Hiroaki Namba, Yasuaki Einaga\* and Takashi Yamamoto\**

Department of Chemistry, Keio University, 3-14-1 Hiyoshi, Yokohama 223-8522, Japan

## Contents.

Synthesis of Co-Ni(OH)<sub>2</sub>, and Co-Ni-Br, -NO<sub>3</sub>, and -CnSO<sub>3</sub> (*n* = 4, 6, 8, 10, and 12) LDH.

**Figure S1.** XRD patterns of Co-Ni-Br and -NO<sub>3</sub> LDH.

**Figure S2.** TG curves of Co-Ni-Br, -NO<sub>3</sub>, and -CnSO<sub>3</sub> (*n* = 2, 4, 6, 8, 10, and 12) LDH.

**Figure S3.**  $\chi_M T$  vs *T* and  $\chi_M^{-1}$  vs *T* plots of Co-Ni- Br and -NO<sub>3</sub> LDH.

**Figure S4.**  $\chi_M T$  vs *T* plots of Co-Ni-CnSO<sub>3</sub> (*n* = 4, 6, 8, 10, and 12) LDH.

**Figure S5.**  $\chi_M^{-1}$  vs *T* plots of Co-Ni-CnSO<sub>3</sub> (*n* = 4, 6, 8, 10, and 12) LDH.

**Figure S6.** ZFC-FC magnetizations of Co-Ni-Br, -NO<sub>3</sub>, and -CnSO<sub>3</sub> LDH (*n* = 4, 6, 8, 10, and 12).

**Figure S7.** Field-dependent magnetizations of Co-Ni-Br, -NO<sub>3</sub>, and -CnSO<sub>3</sub> LDH (*n* = 4, 6, 8, 10, and 12).

**Figure S8.** Hysteresis loops of Co-Ni-Br, -NO<sub>3</sub>, and -CnSO<sub>3</sub> LDH (*n* = 4, 6, 8, 10, and 12).

**Scheme 1.** Synthesis of Co-Ni-CnSO<sub>3</sub> LDH<sup>a</sup>

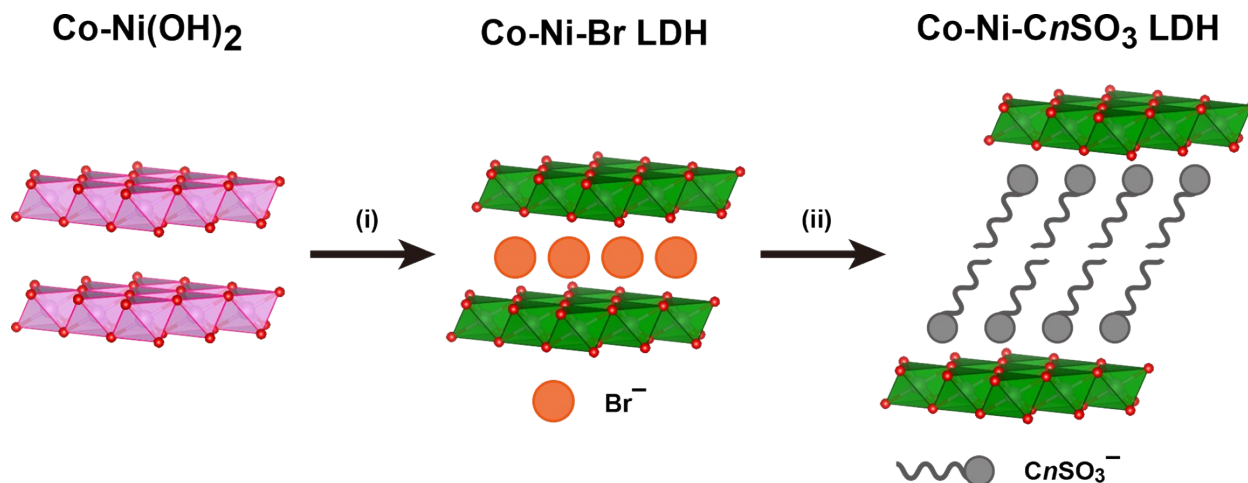

<sup>a</sup>Illustrations drawn by using the software VESTA 3: K. Momma and F. Izumi, VESTA 3 for Three-Dimensional Visualization of Crystal, Volumetric and Morphology Data. *J. Appl. Crystallogr.*, 2011, **44**, 1272–1276.

Synthesis of the precursor, Co-Ni(OH)<sub>2</sub>, was carried out as follows. Cobalt chloride hexahydrate (CoCl<sub>2</sub>·6H<sub>2</sub>O, 1.19 g, 5.00 mmol), nickel chloride hexahydrate (NiCl<sub>2</sub>·6H<sub>2</sub>O, 0.594 g, 2.50 mmol), and hexamethylenetetramine (6.31 g, 45.0 mmol) were dissolved into water (1000 mL), and refluxed for 5 h under an argon atmosphere. The precipitate was filtered, washed with water and ethanol, and then air-dried.

Synthesis of Co-Ni-Br LDH was carried out with an oxidative intercalation approach. Bromine (1.12 g, 12.1 mmol) was dissolved into acetonitrile (600 mL). Co-Ni(OH)<sub>2</sub> (1.07 g) was dispersed into the solution after purging with argon gas, followed by stirring for 24 h at room temperature under an argon atmosphere. The precipitate was collected by centrifugation, washed with ethanol, and air-dried.

Synthesis of Co-Ni-NO<sub>3</sub> LDH was carried out with an ethanol-assisted anion-exchange approach. Sodium nitrate (25.5 g, 3.00 mmol) was dissolved into ethanol/water solution (200 mL, 1:1 v/v). Co-Ni-Br LDH (0.250 g) was dispersed into the solution after purging with argon gas, followed by stirring for 24 h at room temperature under an argon atmosphere. The precipitate was filtered, washed with water and ethanol, and then air-dried.

Synthesis of Co-Ni-C<sub>n</sub>SO<sub>3</sub> LDH was carried out with an ethanol-assisted anion-exchange approach. Added amount of *n*-alkylsulfonates, Co-Ni-Br LDH, and volume of ethanol/water solution were listed as Table S1. The dispersion was purged with argon gas, followed by stirring for 24 h at room temperature (*n* = 4) or refluxing 24 h (*n* = 6, 8, 10, and 12) under an argon atmosphere. The product was filtered, washed with ethanol, and air-dried.

**Table S1.** Added amount of Co-Ni-Br LDH, *n*-alkylsulfonates, and volume of ethanol/water solution.

| Sample                       | Co-Ni-Br LDH (g) | <i>n</i> -Alkylsulfonate (g; mmol) | Ethanol/Water (mL) |
|------------------------------|------------------|------------------------------------|--------------------|
| Co-Ni-C4SO <sub>3</sub> LDH  | 0.134            | 26.2; 164                          | 120                |
| Co-Ni-C6SO <sub>3</sub> LDH  | 0.188            | 40.1; 220                          | 160                |
| Co-Ni-C8SO <sub>3</sub> LDH  | 0.182            | 47.5; 220                          | 160                |
| Co-Ni-C10SO <sub>3</sub> LDH | 0.185            | 49.1; 201                          | 160                |
| Co-Ni-C12SO <sub>3</sub> LDH | 0.155            | 50.6; 186                          | 240                |

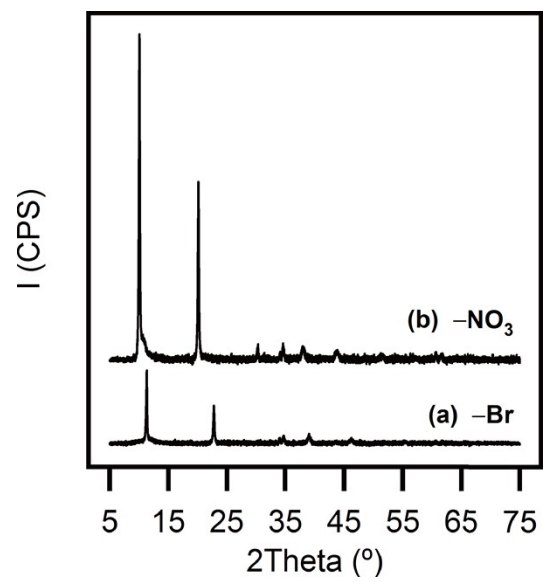

**Fig S1.** XRD patterns: Co-Ni-Br (a), and -NO<sub>3</sub> (b) LDH.

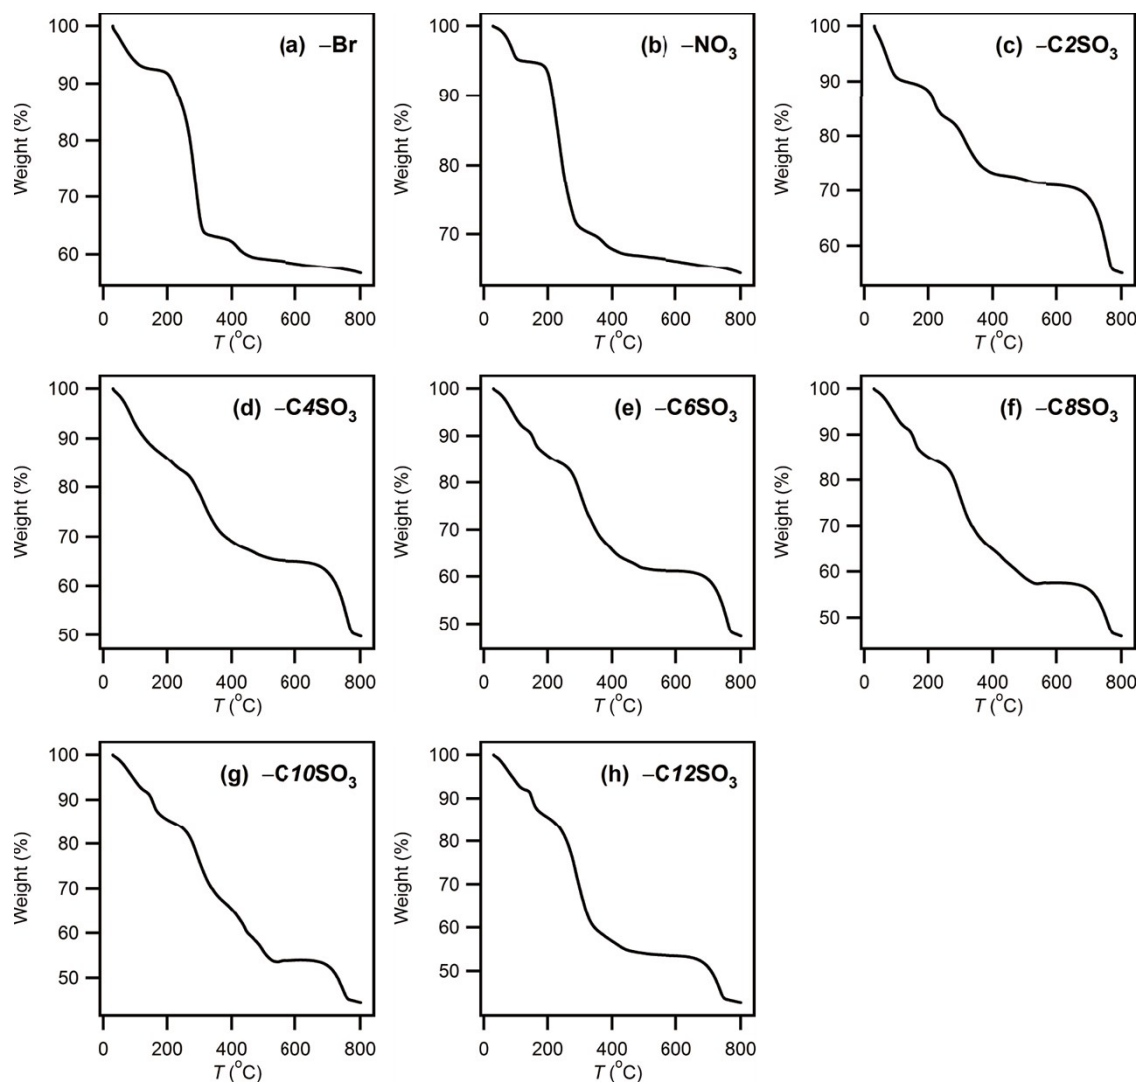

**Fig S2.** TG curves: Co-Ni-Br (a), -NO<sub>3</sub> (b), -C<sub>2</sub>SO<sub>3</sub> (c), -C<sub>4</sub>SO<sub>3</sub> (d), -C<sub>6</sub>SO<sub>3</sub> (e), -C<sub>8</sub>SO<sub>3</sub> (f), -C<sub>10</sub>SO<sub>3</sub> (g), -C<sub>12</sub>SO<sub>3</sub> (h) LDH.

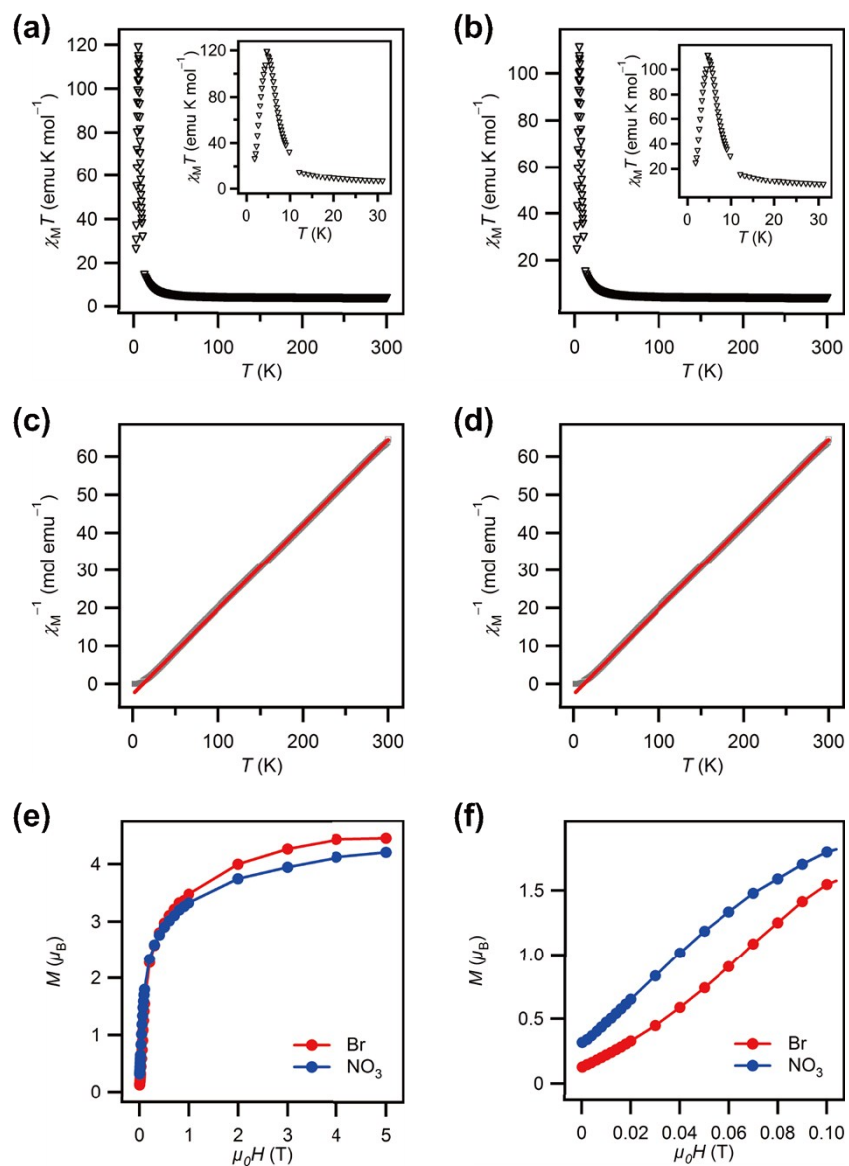

**Fig S3.** Plots of  $\chi_M T$  against  $T$  between 2 and 300 K for Co-Ni-Br (a) and -NO<sub>3</sub> (b) LDH. Inset shows the plots of  $\chi_M T$  against  $T$  in the low-temperature region (2–30 K). Plots of  $\chi_M^{-1}$  against  $T$  between 2 and 300 K for Co-Ni-Br (c) and -NO<sub>3</sub> (d) LDH. The red solid line is fit to the Curie–Weiss law in the high temperature region (150–300 K). Field-dependent magnetization at 2 K: (e) up to 5 T and (f) the low-field region up to 0.1 T. The solid lines are guided to eyes.

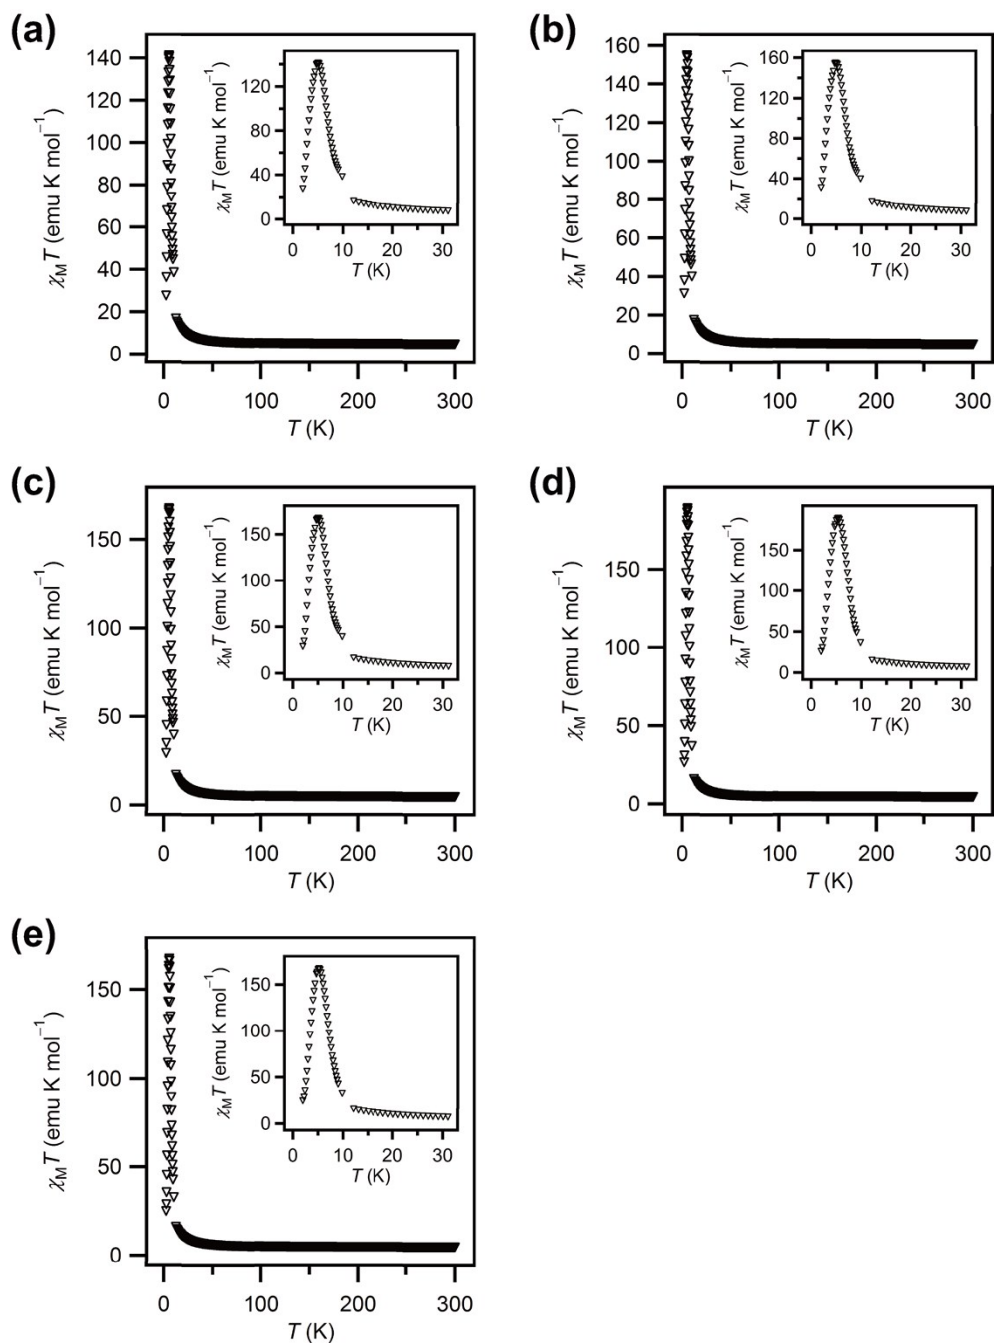

**Fig S4.** Plots of  $\chi_M T$  against  $T$  between 2 and 300 K under 5000 Oe: Co-Ni-C4SO<sub>3</sub> (a), -C6SO<sub>3</sub> (b), -C8SO<sub>3</sub> (c), -C10SO<sub>3</sub> (d), -C12SO<sub>3</sub> (e) LDH. Inset shows the plots of  $\chi_M T$  against  $T$  in the low-temperature region (2–30 K).

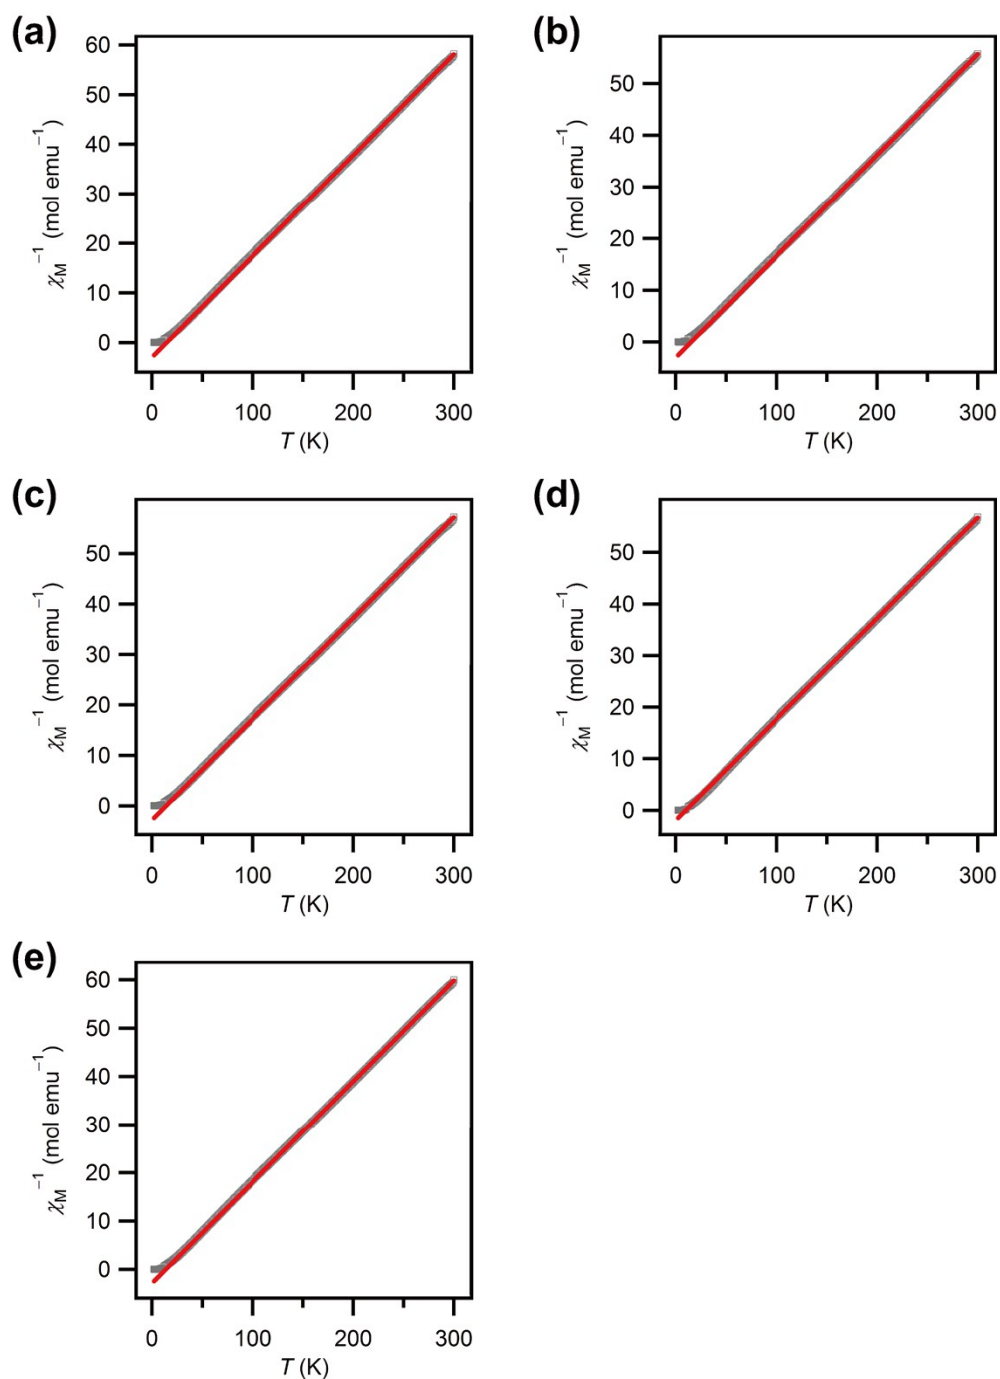

**Fig S5.** Plots of  $\chi_M^{-1}$  against  $T$  between 2 and 300 K under 5000 Oe: Co-Ni-C4SO<sub>3</sub> (a), -C6SO<sub>3</sub> (b), -C8SO<sub>3</sub> (c), -C10SO<sub>3</sub> (d), -C12SO<sub>3</sub> (e) LDH. The red solid line is fit to the Curie–Weiss law in the high temperature region (150–300 K).



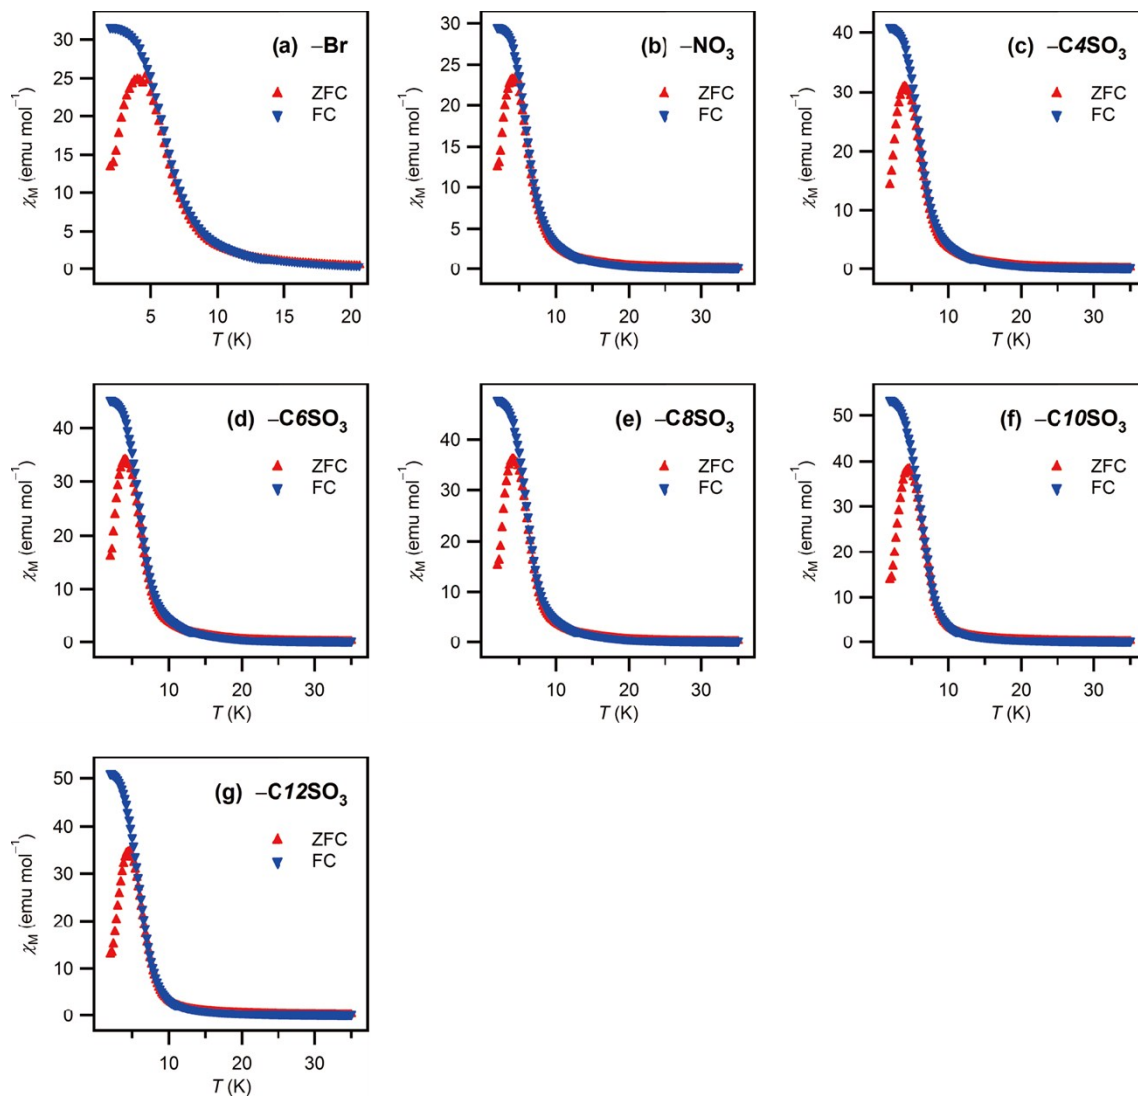

**Fig S6.** ZFC-FC magnetizations under 100 Oe: Co-Ni-Br (a), -NO<sub>3</sub> (b), -C<sub>4</sub>SO<sub>3</sub> (c), -C<sub>6</sub>SO<sub>3</sub> (d), -C<sub>8</sub>SO<sub>3</sub> (e), -C<sub>10</sub>SO<sub>3</sub> (f), -C<sub>12</sub>SO<sub>3</sub> (g) LDH.

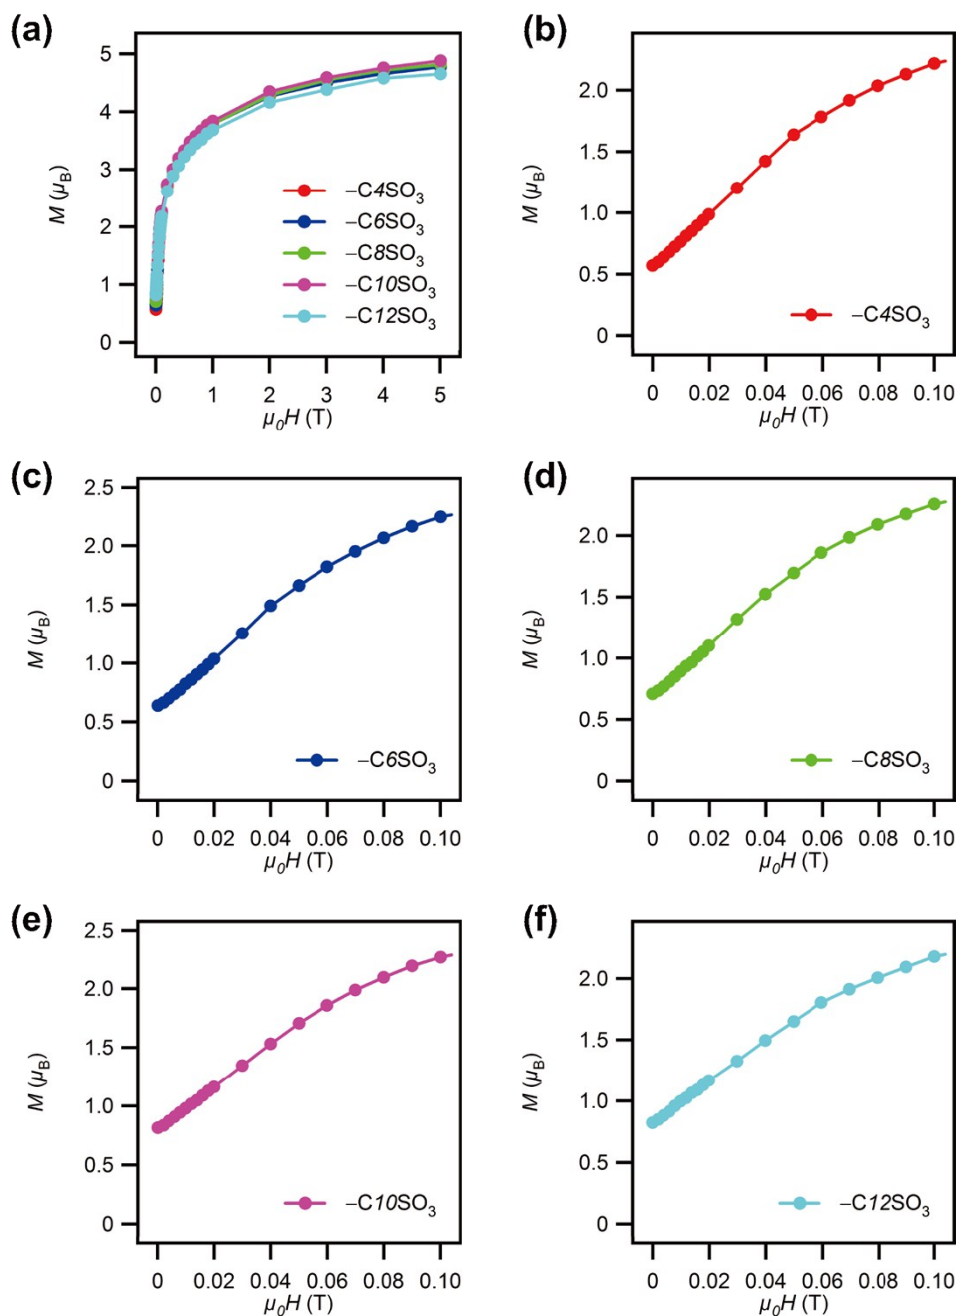

**Fig S7.** Field-dependent magnetizations at 2 K: (a) up to 5 T for Co-Ni- $C_n$ SO<sub>3</sub> ( $n = 4, 6, 8, 10$ , and 12), and the low-field region up to 0.1 T for (b) Co-Ni-C4SO<sub>3</sub>, (c) -C6SO<sub>3</sub>, (d) -C8SO<sub>3</sub>, (e) -C10SO<sub>3</sub>, (f) -C12SO<sub>3</sub> LDH. The solid lines are guided to eyes.

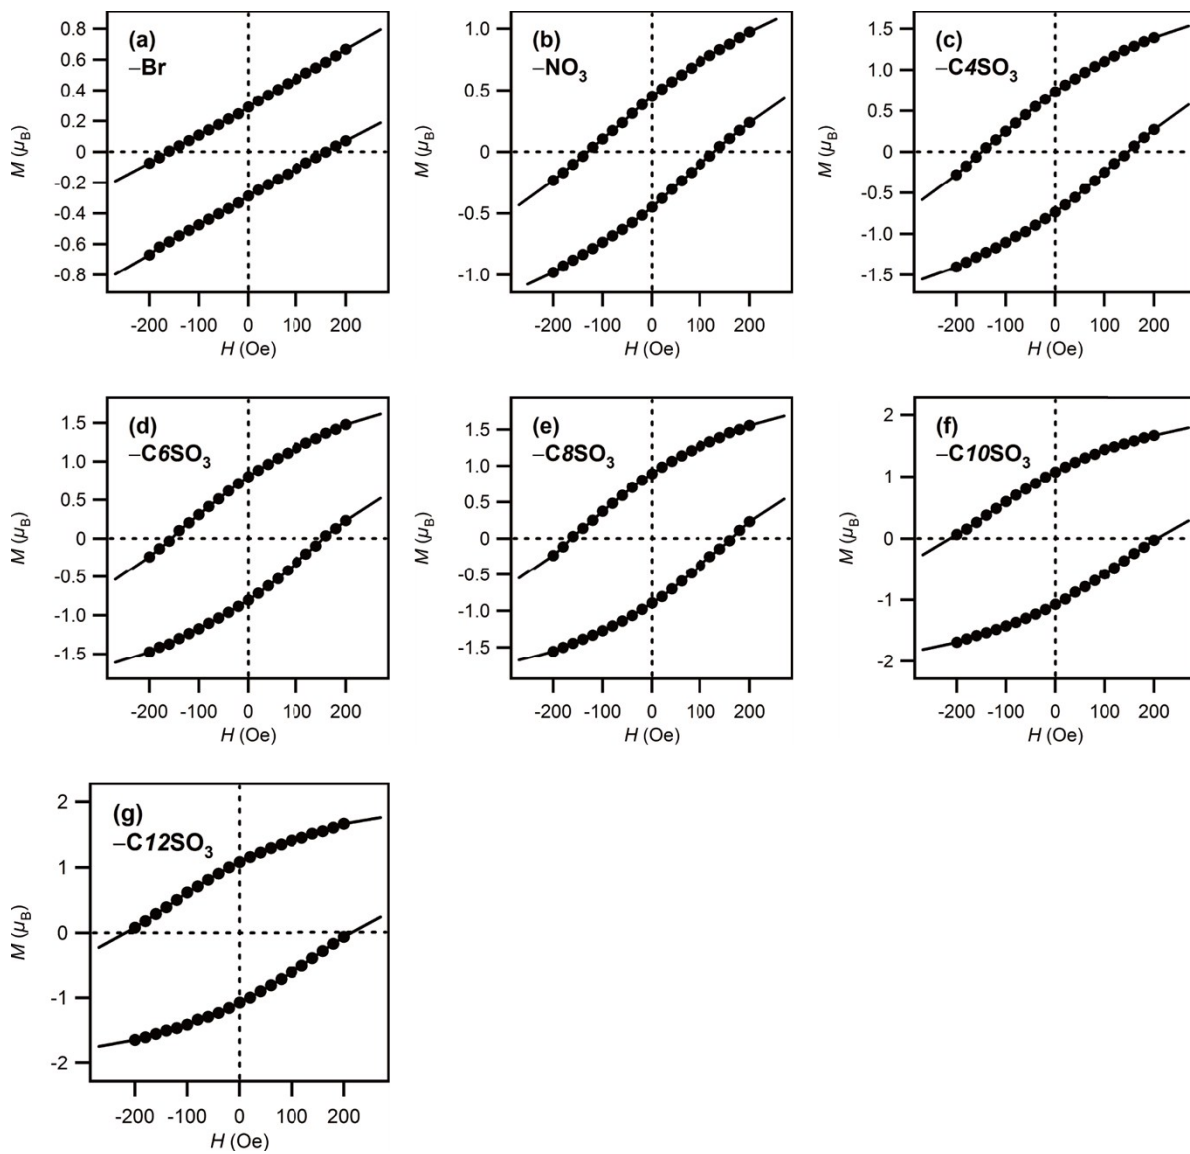

**Fig S8.** Hysteresis loops at 2 K: Co-Ni-Br (a),  $-\text{NO}_3$  (b),  $-\text{C4SO}_3$  (c),  $-\text{C6SO}_3$  (d),  $-\text{C8SO}_3$  (e),  $-\text{C10SO}_3$  (f),  $-\text{C12SO}_3$  (g) LDH. The solid lines are guided to eyes.
